# Biofilm self-patterning: mechanical forces drive a reorientation cascade

Japinder Nijjer<sup>1</sup>, Changhao Li<sup>2</sup>, Qiuting Zhang<sup>1</sup>, Haoran Lu<sup>1</sup>, Sulin Zhang<sup>2,3\*</sup>, Jing Yan<sup>1,4\*</sup>

<sup>1</sup>Department of Molecular, Cellular and Developmental Biology, Yale University, New Haven, CT, USA.

<sup>2</sup>Department of Engineering Science and Mechanics, Pennsylvania State University, University Park, PA, USA.

<sup>3</sup>Department of Biomedical Engineering, Pennsylvania State University, University Park, PA, USA.

<sup>4</sup>Quantitative Biology Institute, Yale University, New Haven, CT, USA.

## Abstract:

In growing active matter systems, a large collection of engineered or living autonomous units metabolize free energy and create order at different length scales as they proliferate and migrate collectively. One such example is bacterial biofilms, which are surface-attached aggregates of bacterial cells embedded in an extracellular matrix. However, how bacterial growth coordinates with cell-surface interactions to create distinctive, long-range order in biofilms remains elusive. Here we report a collective cell reorientation cascade in growing *Vibrio cholerae* biofilms, leading to a differentially ordered, spatiotemporally coupled core-rim structure reminiscent of a blooming aster. Cell verticalization in the core generates differential growth that drives radial alignment of the cells in the rim, while the radially aligned rim in turn generates compressive stresses that expand the verticalized core. Such self-patterning disappears in adhesion-less mutants but can be restored through opto-manipulation of growth. Agent-based simulations and two-phase active nematic modeling reveal the strong interdependence of the driving forces for the differential ordering. Our findings provide insight into the collective cell patterning in bacterial communities and engineering of phenotypes and functions of living active matter.

26 **Main Text:**

27 The spatiotemporal patterning of cells is a fundamental morphogenetic process that has profound  
28 effects on the phenotypes and functions of multicellular organisms<sup>1-3</sup>. In the prokaryotic domain,  
29 bacteria are often observed to form organized multicellular communities surrounded by  
30 extracellular matrices<sup>4,5</sup>, known as biofilms<sup>6,7</sup>, which are detrimental due to persistent infections,  
31 clogging of flows, and surface fouling, but can be beneficial in the context of wastewater  
32 treatment<sup>8</sup> and microbial fuel cells<sup>9</sup>. During development, biofilms exhibit macroscopic  
33 morphological features ranging from wrinkles, blisters, to folds<sup>10-12</sup>. At the cellular scale, recent  
34 progress in single-cell imaging has revealed the reproducible three-dimensional architecture and  
35 developmental dynamics of biofilms<sup>13-16</sup>. However, how the cellular ordering emerges from  
36 individual bacterium trajectories remains poorly understood. In particular, it remains unclear how  
37 cell proliferation is coordinated with intercellular interactions in a growing biofilm to elicit robust  
38 self-patterning against bacteria's inherent tendency to grow in an unstructured manner<sup>17-19</sup>. An  
39 understanding of how individual cell growth links to collective patterning as a result of self-  
40 generated forces can provide insights into the developmental program of biofilms<sup>6</sup>, their physical  
41 properties<sup>20</sup>, and the engineering of living and nonliving active-matter analogs<sup>21,22</sup>.

42  
43 To bridge the gap between interactions at the cellular scale and patterns at the community scale,  
44 here we combine single-cell imaging and agent-based simulations to reveal the underlying  
45 mechanism for self-patterning in biofilm formed by *Vibrio cholerae*, the causal agent of the  
46 pandemic cholera. We observe that biofilm-dwelling bacteria self-organize into an aster pattern,  
47 which emerges from a robust reorientation cascade, involving cell verticalization in the core and  
48 radial alignment in the growing rim. We reveal that the verticalized core generates directional flow  
49 that drives radial alignment of the cells in the periphery, while the radially aligned rim generates

50 compressive stresses that expand the verticalized core, leading to a robust, inter-dependent  
51 differential orientational ordering. Based on these findings, we derive a two-phase active nematic  
52 model for biofilm self-patterning, which is potentially generalizable to other developmental  
53 systems with growth-induced flows<sup>23,24</sup>. Our findings suggest that the self-generated cellular force  
54 landscape, rather than chemical signaling or morphogen gradients as often seen in eukaryotic  
55 cells<sup>25</sup>, controls pattern formation in biofilms.

56

### 57 ***V. cholerae* biofilms self-organize into aster patterns**

58 We imaged the growth of *V. cholerae* biofilms confined between glass and an agarose gel at single-  
59 cell resolution (Fig. 1a). We used a constitutive biofilm producer locked in a high c-di-GMP state<sup>26</sup>  
60 and focused on the biophysical aspects of self-organization. To simplify our studies, we focused  
61 on a mutant missing the cell-to-cell adhesion protein RbmA – this strain is denoted as WT\* –  
62 although our analysis is equally applicable to strains with cell-to-cell adhesion (Extended Data  
63 Fig. 1). Using confocal microscopy, the 3D architecture of the biofilms was captured over time  
64 from single founder cells to mature biofilms consisting of thousands of cells (Fig. 1b;  
65 Supplementary Video 1). An adaptive thresholding algorithm was used to segment individual cells  
66 in the 3D biofilm (Extended Data Fig. 2; Supplementary Information Section 1) from which the  
67 location and direction of each rod-shaped bacterium were identified (Fig. 1c-f). Strikingly, cells in  
68 the basal layer of WT\* biofilms *reproducibly* self-organized into an aster pattern, consisting of a  
69 core with tilted or “verticalized” cells and an outward splaying rim with radially aligned cells (Fig.  
70 1d; Extended Data Fig. 1).

71

72 We quantified the degree of cell ordering in the basal layer using a radial order parameter<sup>27</sup>,  $S =$   
73  $2\langle(\hat{\mathbf{n}}_{\parallel} \cdot \hat{\mathbf{r}})^2\rangle - 1$ , where  $\hat{\mathbf{n}}_{\parallel}$  is the projection of the cell direction on the basal plane and  $\hat{\mathbf{r}}$  is the unit

74 vector along the radial direction (Fig. 1g).  $S$  equals 1 for cells that are aligned in an aster, -1 for  
75 cells that are aligned in a vortex, and 0 for cells that are randomly oriented. We found that cells in  
76 WT\* biofilms exhibited a reproducible tendency to align radially ( $S = 0.54 \pm 0.07$ ) in the rim.  
77 Since previous work has shown that cell-to-surface adhesion controls overall biofilm  
78 morphology<sup>12,14,28</sup>, we hypothesized that cell-to-surface adhesion mediates the dynamic core-rim  
79 patterning of the biofilm. To test this hypothesis, we deleted the genes encoding cell-to-surface  
80 adhesion proteins Bap1 and RbmC<sup>29-31</sup> ( $\Delta BC$ ) and found that the radial order was destroyed in the  
81 resulting biofilms and cells assumed random orientations in the basal plane with  $S = 0.11 \pm 0.11$   
82 (Fig. 1e, g). Concomitant with the disorder was the absence of a verticalized core; most cells in  
83 the basal layer were parallel to the substrate. We further confirmed the important role of cell-to-  
84 surface adhesion by titrating *rbmC* expression: increasing cell-to-surface adhesion enhanced the  
85 self-patterning, resulting in more verticalized cells and stronger radial alignment (Fig. 1h;  
86 Extended Data Fig. 3). Furthermore, removing the extracellular matrix by deleting the key *Vibrio*  
87 polysaccharide ( $\Delta vpsL$ )<sup>32</sup> resulted in locally aligned microdomains of horizontal cells without  
88 long-range order ( $S = 0.02 \pm 0.08$ ; Fig 1f, g), in line with previous studies on growing 2D  
89 bacterial colonies<sup>18,19</sup>. These observations suggest that exopolysaccharide production controls a  
90 *local* order-to-disorder transition, whereas cell-to-surface adhesion controls a *global* order-to-  
91 disorder transition.

92  
93 To determine the driving forces behind the observed orientational ordering, we extended a  
94 previous agent-based model,<sup>33</sup> taking into account cell-to-cell and cell-to-surface interactions  
95 (Supplementary Information Section 2). Our agent-based modeling reproduced the observed aster  
96 pattern formation in adherent cells, but not in nonadherent cells, in agreement with experiments  
97 (Extended Data Fig. 4; Supplementary Video 2). As the agent-based model only incorporates

98 mechanical interactions, without any biochemical signals, our results suggest that the emergent  
99 patterns originate primarily from the mechanical interplay between the cells and between cells and  
100 the substrate.

## 101

### 102 **Surface adhesion drives ordering through differential growth**

103 In molecular liquid crystals, a lower temperature favors order due to the entropic driving force.  
104 For out-of-equilibrium systems, such as growing biofilms, the driving force for ordering is more  
105 complex. We hypothesized that radial organization arises from the mechanical coupling between  
106 cells through their self-generated flow field<sup>34</sup>, inspired by the alignment of rod-shaped objects  
107 under fluid shear<sup>35</sup>. Note that biofilm-dwelling cells are nonmotile; flow in this context is generated  
108 through cell growth and cell-cell interactions. To test our hypothesis, we tracked cell orientations  
109 and trajectories *simultaneously* during biofilm development by using strains expressing a single  
110 intracellular punctum (Fig. 2a-e, Extended Data Fig. 5; Supplementary Video 3)<sup>16</sup>. As WT\*  
111 biofilms grew, cells towards the center tilted away from the substrate, developing a core of  
112 verticalized cells that expanded over time (Fig. 2c). The resulting growth-induced flow field had  
113 a zero-velocity core (Fig. 2a, d), corresponding to the verticalized cells that project their offspring  
114 into the third dimension (Fig. 1d). In contrast, in the nonadherent mutant, the velocity field simply  
115 scaled linearly with the radial position. From the measured velocity field, we extracted the  
116 *apparent* in-plane proliferation rate  $g$  (Fig. 2b, Fig. 2d inset). We found that  $g$  was uniform in the  
117 nonadherent biofilm: all cells in the basal layer were predominantly parallel to the substrate and  
118 therefore contributed to the basal layer expansion. In contrast, in the WT\* biofilm, a growth void  
119 ( $g \approx 0$ ) emerged in the center, with nearly uniform growth in the outer growing rim. Concomitant  
120 with the initiation of differential growth, cells aligned in an aster pattern, marked by a  
121 growing  $S(r)$  with a rising peak near the edge of the verticalized core (Fig. 2e).

122

### 123 **A reorientation cascade governs biofilm self-patterning**

124 We hypothesize that a mechanical synergy between cell verticalization, growth-induced flow, and  
125 aster pattern formation propels a reorientation cascade for biofilm self-patterning. On one hand,  
126 cell-to-surface adhesion coupled with growth-induced mechanical stresses leads to *stably*  
127 anchored, verticalized cells in the biofilm center, which results in differentially oriented  
128 proliferation. On the other, differential proliferation drives cellular flows that radially align the  
129 cells in the rim, which in turn facilitates cell verticalization and core expansion. Below, we analyze  
130 the dynamic interplay of these two reorientation processes.

131

132 **Step 1:** To illustrate the formation and stabilization of the verticalized core, we consider a reduced  
133 problem consisting of a spherocylindrical cell that is parallel and adhered to a substrate and  
134 squeezed by two neighbors (Supplementary Information Section 3). The resulting energy  
135 landscape displays two distinct mechanical instabilities (Fig. 2f). The first instability corresponds  
136 to the verticalization event reported earlier<sup>33,36–38</sup>. Briefly, cells in a growing population  
137 mechanically push each other, generating pressure. This pressure accumulates and eventually  
138 exceeds a threshold, causing cells to rotate away from the substrate (verticalize). The second  
139 instability corresponds to the “pinch-off” of these verticalized cells. In this case, neighboring cells  
140 generate forces in the out-of-plane direction, causing ejection of the verticalized cells from the  
141 substrate. For WT\* cells, our analysis shows that pinching a vertical cell off the surface is  
142 energetically much more costly than verticalizing a horizontal cell. Therefore, pinch-off is  
143 kinetically hindered and verticalized cells can *stably* inhabit the basal layer. The smaller the cell-  
144 to-surface adhesion, the smaller the energy difference between the two instabilities (Extended Data  
145 Fig. 6) and therefore, the less stable the verticalized cells. The energy difference vanishes in

146 nonadherent cells, resulting in spontaneous ejection of mutant cells upon verticalization. This  
147 explains the absence of verticalized cells in the mutant biofilms and bacterial colonies (Fig. 1e, f).  
148 In the WT\* biofilms, verticalization preferentially occurs near the center where pressure is  
149 relatively high, leading to an expanding verticalized core<sup>33</sup>. Since rod-shaped cells grow and divide  
150 along their long axes, this spatial segregation of cell orientation leads to spatially patterned  
151 differential growth.

152

153 **Step 2:** Next, we employ active nematic theory<sup>34,39,40</sup> to elucidate how differential growth can  
154 induce radial alignment. Defining the nematic order parameter  $\mathbf{Q} = 2\langle \hat{\mathbf{n}}_{\parallel} \otimes \hat{\mathbf{n}}_{\parallel} - \mathbf{I}/2 \rangle$  as the head-  
155 tail symmetric tensor of cell orientation, mesoscopically averaged over a small region, its evolution  
156 in a surrounding flow  $\mathbf{u}$  is given by<sup>41</sup>

$$(\partial_t + \mathbf{u} \cdot \nabla) \mathbf{Q} - \Gamma \mathbf{H} = \lambda \mathbf{E} + \boldsymbol{\omega} \cdot \mathbf{Q} - \mathbf{Q} \cdot \boldsymbol{\omega}, \quad (1)$$

157 where the right-hand side quantifies the driving force for the rod-shaped particles to rotate within  
158 a velocity gradient field. Here  $\mathbf{E} = \frac{1}{2}[\nabla \mathbf{u} + \nabla \mathbf{u}^T - (\nabla \cdot \mathbf{u})\mathbf{I}]$  is the traceless strain-rate tensor,  $\boldsymbol{\omega} =$   
159  $\frac{1}{2}(\nabla \mathbf{u} - \nabla \mathbf{u}^T)$  is the vorticity tensor, and  $\lambda$  is the flow-alignment parameter. For rod-shaped  
160 objects  $\lambda > 0$ , corresponding to a tendency for the rods to align with flow streamlines<sup>17</sup>. Finally,  
161 the nematic alignment term  $\Gamma \mathbf{H}$  relaxes  $\mathbf{Q}$  towards a bulk state with minimal angular variation,  
162 however, its contribution in biofilms is expected to be negligible since cells are buffered from each  
163 other by soft exopolysaccharides (Supplementary Information Section 4). Assuming axisymmetry,  
164 the evolution of the cell orientation field is given by<sup>19,34</sup>

$$\partial_t \Theta + u_r \partial_r \Theta = -f(r, t) \sin(2\Theta), \quad (2)$$

165 where  $\Theta$  is the angle between the local orientation field and the radial direction,  $f =$   
166  $(\lambda r/4q) \partial_r (u_r/r)$  quantifies the aligning torque due to gradients in the flow field, and  $q$  quantifies

167 the degree of local ordering (Supplementary Information Section 4). From  $\partial_t \Theta \sim -f \sin(2\Theta)$ , we  
168 find that a nonzero  $f$  causes cells to rotate, and the direction of rotation is critically dependent on  
169 the sign of  $f$ .

170

171 Unlike passive liquid crystals, biofilm-dwelling cells generate their own velocity field through  
172 growth. Assuming uniform density, mass conservation requires  $\nabla \cdot \mathbf{u} = g(r)$ . In nonadherent  
173 mutant biofilms and bacterial colonies, growth is exclusively in-plane with a uniform growth rate  
174  $\gamma$ , resulting in a linear velocity field,  $u_r = \gamma r/2$ , and thus a vanishing driving force for cell  
175 alignment ( $f = 0$ ). Under this condition, cells are simply advected outwards without any tendency  
176 to align, leading to a disordered pattern. In contrast, in WT\* biofilms, verticalization stabilizes an  
177 expanding in-plane growth void,  $r_0(t)$ . This corresponds to a differential growth rate  $g(r)$ : 0 for  
178  $r \leq r_0$  and  $\gamma$  for  $r > r_0$ . The resulting velocity field is  $\gamma(r - r_0^2/r)/2$  for  $r > r_0$ , leading to a  
179 *strictly positive* driving force for radial alignment,  $f = \frac{\lambda \gamma r_0^2}{4qr^2} > 0$ , in the outer growing rim. In this  
180 case,  $\Theta$  dynamically approaches 0, characteristic of an aster (Extended Data Fig. 7). In fact, long-  
181 range order can be induced whenever a 2D growing bacterial colony deviates from an isotropically  
182 expanding pattern, for instance when confined in a rectangular geometry<sup>42,43</sup> or during inward  
183 growth<sup>34</sup>. This model thus reveals that differential growth, established by a verticalized core ( $r_0 \neq$   
184 0), generates the driving force for radial alignment in a growing biofilm. This driving force  
185 vanishes in the absence of a core ( $r_0 = 0$ ), leading to a disordered phenotype.

186

### 187 **Imposing a growth void reproduces radial ordering**

188 A key prediction of the active nematic theory is that a growth void is *sufficient* to induce radial  
189 organization. To test this prediction, we patterned a growth void into an otherwise disordered



190 biofilm. Specifically, we started with a nonadherent biofilm already grown for 17 hours and used  
191 a 405 nm laser to selectively kill the cells in the center. The vestiges of the dead cells sustained a  
192 growth void (Extended Data Fig. 8), mimicking the verticalized core in the WT\* biofilm.  
193 Consistent with our model prediction, the proliferating cells aligned radially over time in biofilms  
194 with a growth void, whereas biofilms without a growth void remained disordered (Fig. 3a-c).  
195 Conversely, our theory predicts that *excess* growth at the biofilm center should lead to  $f < 0$  and  
196 therefore to vortex formation (Supplementary Information Section 4). Indeed, in another set of  
197 experiments, we observed that the nonadherent cells aligned circumferentially when excess growth  
198 was introduced at the center (Extended Data Fig. 9). We also quantitatively tested the validity of  
199 the model by prescribing a growth void with a fixed size  $r_0$  in a set of simplified 2D agent-based  
200 models (Extended Data Fig. 7; Supplementary Video 4). We found that the instantaneous angular  
201 velocity of individual cells scaled linearly with  $\sin(2\theta)/r^2$  and increasing  $r_0$  led to a quadratic  
202 increase in the angular velocity, all in agreement with the theory (Fig. 3d). Note that in both  
203 simulations and experiments, the radial order quickly saturated in the patterned biofilm with a  
204 fixed  $r_0$ , since the aligning force decays with  $1/r^2$  as cells are advected outward. Thus, a growing  
205  $r_0(t)$  is necessary to reinforce radial alignment during biofilm expansion. This is indeed the case  
206 in WT\* biofilms: growth of the outer rim accumulates pressure to generate more verticalized cells  
207 and expand the verticalized core, which in turn continuously drives alignment in the outer  
208 horizontal cells. To interrogate the mechanical interplay between these reorientation processes, we  
209 next develop a minimal physical model coupling verticalization of individual cells to the long-  
210 range radial ordering.

211

212 **Two-phase model of cell organization**

213 We decompose the biofilm into populations of two phases with vertical and horizontal cells and  
214 take the phase fractions to be  $\rho$  and  $1 - \rho$ , respectively. The growth kinetics of the phases are  
215 governed by

$$\begin{aligned} \partial_t \rho + \nabla \cdot (\mathbf{u}\rho) &= C(p)(1 - \rho), \\ \partial_t(1 - \rho) + \nabla \cdot (\mathbf{u}(1 - \rho)) &= \gamma(1 - \rho) - C(p)(1 - \rho). \end{aligned} \tag{3a,b}$$

216 Here we assume that the horizontal-to-vertical conversion is driven by the local pressure  $p$ , where  
217  $C(p)$  is the conversion rate. We further assume that pressure arises from friction with the substrate  
218  $\nabla p = \eta \mathbf{u}$ , where  $\eta$  is the friction coefficient, and that only the horizontal cells generate growth in  
219 the basal layer,  $\nabla \cdot \mathbf{u} = \gamma(1 - \rho(\mathbf{r}))$ . Combined with Eq. (2), these equations generate a complete  
220 continuum description of the dynamics of cell growth and reorientation in biofilms  
221 (Supplementary Information Section 4). Numerical solutions of the model quantitatively  
222 reproduce the cascade of self-organization events (Fig. 4a-d), showing the intimate spatiotemporal  
223 coupling between cell verticalization and radial alignment.

224  
225 Many salient features of the experimental results are recapitulated by the model: for example,  $S(r)$   
226 reaches a maximum near the verticalized core where the driving force is the strongest.  
227 Interestingly, the model reveals a frozen core where cells cease to reorganize (compare Fig. 2e and  
228 Fig. 4d): as the in-plane velocity goes to zero, the driving force to rotate also vanishes – cells in  
229 the core are thus locked as a “fossil record” that memorizes the mechanical history they have  
230 experienced. Importantly, the model yields robust results: regardless of the initial conditions and  
231 choice of parameters (Extended Data Fig. 10), a WT\* biofilm always patterns itself following the  
232 sequence shown in Fig. 4e. Our two-phase active nematic model thus elucidates the reproducible  
233 mechanical blueprint that guides biofilm development.

234

## 235 **Discussion**

236 To conclude, our results reveal a mechanically driven self-patterning mechanism in bacterial  
237 biofilms in which cells synergistically order into an aster pattern. Specifically, we showed that  
238 surface adhesion leads to stable cell verticalization, which in turn directs radial cell alignment  
239 during surface expansion. Evidently, this inter-dependent differential ordering involves biofilm-  
240 wide, bidirectional mechanical signal generation and transmission, in contrast to the biochemical  
241 signaling widely observed in other living organisms. In *On Growth and Form*<sup>44</sup>, D’Arcy  
242 Thompson wrote: “... growth [is] so complex a phenomena...rates vary, proportions change, and  
243 the whole configuration alters accordingly.” Although over a century old, this statement still rings  
244 true today. Our two-phase active nematic model provides a mathematical formalism for this  
245 statement in the context of bacterial biofilms.

246  
247 Spontaneous flow generation is a common phenomenon in various developmental systems,  
248 including zebrafish embryonic development<sup>24</sup>, ventral furrow formation in *Drosophila*<sup>23</sup>, etc.  
249 While flow causes bulk morphological changes in these systems, in biofilms it acts to transmit  
250 mechanical forces and drive long-range organization. It is intriguing to contemplate whether the  
251 synchronous mechanical coupling between differentially grown cells and the resulting pattern  
252 could be generalized to other organisms with anisotropic growth of polarized cells. In a broader  
253 context, cell polarity and organization critically underlie collective cell function and normal  
254 development, as exemplified by topological defects that mediate 2D-to-3D transitions in motile  
255 bacterial colonies<sup>45</sup> and cell death and extrusion in epithelial layers<sup>46</sup>. Our findings hence shed  
256 light on the biomechanical control of cell organization through the spatiotemporal patterning of  
257 growth and pave the way to controlling cell organization by encoding synthetic biological circuits  
258 or optogenetic manipulation<sup>47</sup>.

## 259 **Methods**

### 260 Bacterial strains and cell culture

261 Strains used in this study were derivatives of the *V. cholerae* strain C6706 containing a  
262 missense mutation in the *vpvC* gene (*vpvC*<sup>W240R</sup>), which resulted in constitutive biofilm production  
263 through the upregulation of c-di-GMP (rugose/Rg strain). For the majority of the results presented  
264 in this work, we used a strain in which the gene encoding the cell-to-cell adhesion protein RbmA  
265 was deleted to minimize the effects of intercellular adhesion; however, we found that our analysis  
266 equally applied to the rugose strain (Extended Data Fig. 1). We primarily worked with two other  
267 mutants: 1)  $\Delta BC$  which included additional deletions of *bap1* and *rbmC* genes, and 2)  $\Delta vpsL$  in  
268 which a key exopolysaccharide biogenesis gene was deleted in the rugose background (Rg $\Delta vpsL$ ).  
269 In the absence of *bap1* and *rbmC*, the  $\Delta BC$  mutant cells were unable to adhere to the substrate  
270 (referred to as the nonadherent mutant throughout the text). In the absence of *vpsL*, the cells did  
271 not properly synthesize exopolysaccharides and consequently, all accessory matrix proteins, which  
272 bind to the exopolysaccharide, did not function properly<sup>14</sup>. For velocity field measurements, we  
273 used strains containing the  $\mu$ NS protein from the avian reovirus fused to an mNeonGreen  
274 fluorescent protein, which were shown to self-assemble into a single intracellular punctum<sup>16,48</sup>. All  
275 strains used in the study were also modified to constitutively produce either mNeonGreen or  
276 mScarlet-I fluorescent proteins. Mutations were genetically engineered using either the pKAS32  
277 exchange vector<sup>49</sup> or the MuGENT method<sup>50</sup>. For a full list of strains used, see Table S1. Biofilm  
278 growth experiments were performed using M9 minimal media supplemented with 0.5% glucose  
279 (w/w), 2 mM MgSO<sub>4</sub>, 100  $\mu$ M CaCl<sub>2</sub>, and the relevant antibiotics as required (henceforth referred  
280 to as M9 media).

281 Experiments began by first growing *V. cholerae* cells in liquid LB overnight under shaken  
282 conditions at 37°C. The overnight culture was back-diluted 30 $\times$  in M9 media and grown under

283 shaken conditions at 30°C for 2-2.5 hours until it reached an OD<sub>600</sub> value of 0.1-0.2. The regrown  
284 culture was subsequently diluted to an OD<sub>600</sub> of 0.001 and a 1 µL droplet of the diluted culture  
285 was deposited in the center of a glass-bottomed well in a 96-well plate (MatTek). Concurrently,  
286 agarose was dissolved in M9 media at a concentration of 1.5-2% (w/V) by microwaving until  
287 boiling and then placed in a 50°C water bath to cool without gelation. After cooling, 200 nm far-  
288 red fluorescent particles (Invitrogen F8807) were mixed into the molten agarose at a concentration  
289 of 1% (V/V) to aid in image registration. Next, 20 µL of the molten agarose was added on top of  
290 the droplet of culture and left to cool quickly at room temperature, to gel, and to trap the bacterial  
291 cells at the gel-glass interface. Subsequently, 100 µL of M9 media was added on top of the agarose  
292 gel, serving as a nutrient reservoir for the growing biofilms. The biofilms were then grown at 30°C  
293 and imaged at designated times.

294

#### 295 Image acquisition

296 Images were acquired using a confocal spinning disk unit (Yokogawa CSU-W1), mounted  
297 on a Nikon Eclipse Ti2 microscope body, and captured by a Photometrics Prime BSI CMOS  
298 camera. A 100× silicone oil immersion objective (N.A. = 1.35) along with 488 nm, 561 nm and  
299 640 nm lasers were used for imaging. This combination of hardware resulted in an *x-y* pixel size  
300 of 65 nm and a *z*-step of 130 nm was used. For end-point imaging, biofilms were imaged after 12-  
301 24 hours of growth and only the 488 nm channel, corresponding to the mNeonGreen expressing  
302 cells, was imaged. For time-lapse imaging, samples were incubated on the microscope stage in a  
303 Tokai Hit stage top incubator while the Nikon perfect focus system was used to maintain focus.  
304 Images were captured every 30 minutes, and in addition to the 488 nm channel, the 640 nm channel  
305 was used to image the fluorescent nanoparticles.

306 For velocity measurements, cells constitutively expressing mScarlet-I and mNeonGreen-  
307 labelled puncta were imaged using a slightly modified procedure. The 488 nm channel,  
308 corresponding to the puncta, was imaged every 2-10 minutes while the 561 nm channel,  
309 corresponding to the cells, was imaged every 1-2 hours. This procedure allowed us to image the  
310 relatively bright puncta with low laser intensity and therefore minimal photobleaching and  
311 phototoxicity, as high temporal resolution is required to accurately track puncta motion. To further  
312 reduce photobleaching and phototoxicity, we used a  $z$ -step of 390 nm when imaging the puncta.  
313 When imaging the cells, a  $z$ -step of 130 nm was used in the mScarlet-I channel to sufficiently  
314 resolve the 3D position and orientation of the cells. We also restricted our attention to the basal  
315 flow field and therefore only imaged the bottom 3  $\mu\text{m}$  of each biofilm. All images shown are raw  
316 images rendered by Nikon Elements software unless indicated otherwise.

317

### 318 Overview of image analysis

319 Raw images were first deconvolved using Huygens software (SVI) using a measured point  
320 spread function. The deconvolved three-dimensional confocal images were then binarized, layer  
321 by layer, with a locally adaptive Otsu method. To accurately segment individual bacterium in the  
322 densely packed biofilm, we developed an adaptive thresholding algorithm. For more details see  
323 Supplementary Information Section 1. Once segmented, we extracted the cell positions by finding  
324 the center of mass of each object, and the cell orientations by performing a principal component  
325 analysis. The positions and directions of each cell were converted from cartesian  
326  $(x, y, z, \hat{n}_x, \hat{n}_y, \hat{n}_z)$  to cylindrical polar  $(r, \psi, z, \hat{n}_r, \hat{n}_\psi, \hat{n}_z)$  coordinates where the origin was found  
327 by taking the center of mass of all of the segmented cells in the  $(x, y)$  plane. We define the out-of-  
328 plane component of the direction vector as  $n_{\perp} = \hat{\mathbf{n}} \cdot \hat{\mathbf{z}}$  and the in-plane component as  $\mathbf{n}_{\parallel} = \hat{\mathbf{n}} -$

329  $(\hat{\mathbf{n}} \cdot \hat{\mathbf{z}})\hat{\mathbf{z}}$ , which we normalize as  $\hat{\mathbf{n}}_{\parallel} = \mathbf{n}_{\parallel}/|\mathbf{n}_{\parallel}|$ . Reconstructed biofilm images were rendered using  
330 Paraview.

331

### 332 Measurement of the growth-induced velocity field

333 To measure the growth-induced velocity field we used particle tracking velocimetry on the  
334 puncta trajectories. The deconvolved puncta images were first registered using Matlab built-in  
335 functions. Puncta were then detected by first identifying local intensity maxima in the 3D images,  
336 and sub-pixel positional information was found by fitting a parabola to the pixel intensity around  
337 the maxima. This procedure was repeated for all frames yielding puncta locations over time which  
338 were then connected from frame to frame using a standard particle-tracking algorithm<sup>51</sup>. The radial  
339 velocity  $u_r$  was calculated by fitting a straight line through the time vs. radial displacement data  
340 over a time interval of 1 hr.

341

### 342 Opto-manipulation of cell growth

343 Previous work has shown the bactericidal effects of high energy near-UV light<sup>52</sup>; therefore,  
344 we used spatially patterned 405 nm light to kill a subset of cells within a biofilm. Specifically, an  
345 Opti-Microscan XY galvo-scanning stimulation device with a 405 nm laser was used to selectively  
346 illuminate and kill cells within a cylindrical region at the center of the biofilm. We verified cell  
347 killing by staining the sample with propidium iodide (Extended Data Fig. 8). The same procedure  
348 used to measure the growth-induced velocity field (see above) was applied to the irradiated biofilm  
349 and the control to measure cell orientation and trajectory dynamics simultaneously.

### 350 3D agent-based simulations

351 Building on the agent-based simulations developed by Beroz *et al.*<sup>33</sup> and others<sup>37,53,54</sup>, we  
352 modelled cells as spherocylinders with a cylinder of length  $L(t)$  and two hemispherical caps of  
353 radius  $R$ . The growth of each cell was assumed to be unidirectional and exponential, where the  
354 growth rate  $\gamma$  was normally distributed with a mean of  $\gamma_0$  and a standard deviation of  $0.2\gamma_0$ . Here  
355 noise was added to account for the inherent stochasticity in cell growth and division. Each cell  
356 elongated exponentially until its length reached  $L_{max} = 2L_0 + 2R$ , at which point it was replaced  
357 by two daughter cells with the length  $L_0$ . The doubling time can be calculated to be  $t_{double} =$   
358  $\frac{1}{\gamma} \log\left(\frac{10R+6L_0}{4R+3L_0}\right)$ . The cell-to-cell and cell-to-substrate contact mechanics were described by linear  
359 elastic Hertzian contact mechanics<sup>55</sup>, with a single contact stiffness  $E_0$ ; note that  $E_0$  corresponds  
360 to the modulus of the soft exopolysaccharide in the matrix ( $\sim 10^2$  Pa) rather than the cell itself,  
361 which is much stiffer ( $\sim 10^5$  Pa). Correspondingly, the  $R$  value we used ( $0.8 \mu\text{m}$ ) is larger than the  
362 physical size of a cell ( $\sim 0.4 \mu\text{m}$ ). The parameter values we used were calibrated by rheological  
363 measurement and microscopy analysis, and have been shown to successfully capture the dynamics  
364 of biofilm-dwelling cells in prior work<sup>33</sup>. The cell-to-substrate adhesion energy was assumed to be  
365 linear with the contact area, with adhesion energy density  $\Gamma_0$ . We incorporated two viscous forces  
366 to represent the motion of biofilm-dwelling cells at low Reynold's number: 1) a bulk viscous drag  
367 for all degrees of freedom, and 2) a much larger in-plane surface drag for cells near the substrate,  
368 representing the resistance to sliding when a cell is adhered to the substrate via the surface adhesion  
369 proteins RbmC/Bap1. The two damping forces also ensured that the cell dynamics were always in  
370 the overdamped regime.

371 We treated the confining hydrogel as a homogenous, isotropic, and linear elastic material  
372 using a coarse-grained approach. The geometry of the coarse-grained gel particles was assumed to



373 be spherical with a radius  $R_{\text{gel}}$ . The interaction between particles was modeled using a harmonic  
374 pairwise potential and a three-body potential related to bond angles. The contact repulsions  
375 between the gel particles and the cells as well as between the gel particles and the substrate were  
376 described using linear elastic Hertzian contact mechanics. We treated the adhesion between the  
377 gel and the substrate using a generalized JKR contact model<sup>56</sup> and we also included a small viscous  
378 damping force to ensure the dynamics remained overdamped. The hydrogel was initialized by  
379 annealing the system to achieve an amorphous configuration.

380 Simulations were initialized with a single cell lying parallel to the substrate and  
381 surrounded by gel particles. Initially, a small hemispherical space surrounding the cell was vacated  
382 to avoid overlap between the cell and the hydrogel particles. We fixed a small number of hydrogel  
383 particles near the boundaries to provide anchoring for the elastic deformation of the hydrogel;  
384 however, the boundaries were kept sufficiently far away from the biofilm to minimize any  
385 boundary effects. We applied Verlet integration and Richardson integration to numerically  
386 integrate the equations of motion for the translational and rotational degrees of freedom,  
387 respectively. We implemented the model based on the framework of LAMMPS<sup>57</sup>, utilizing its  
388 built-in parallel computing capability. For a more detailed description on the ABS, see  
389 Supplementary Information Section 2.

390

### 391 Quasi-2D agent-based simulations

392 To further verify the alignment dynamics of the continuum model quantitatively (Eq. 2,  
393 Main Text), we developed a set of quasi-2D simulations to mimic the laser irradiation experiments.  
394 To simplify the system, the translational and rotational degrees of freedom related to the vertical  
395 direction were ignored, while all other parameters were kept the same as the 3D simulations. In  
396 each simulation, the bacteria first proliferate normally for 12 hrs, at which point the growth rate of

397 the cells within a radius  $r_0$  from the center of the biofilm was set to 0, mimicking the zone of dead  
398 cells caused by laser irradiation (Extended Data Fig. 7). In agreement with experiments, the  
399 simulated biofilm was initially randomly oriented ( $S \approx 0$ ); however, cells tended toward an aster  
400 pattern and  $S$  increased over time when the growth void was introduced. The predicted rate at  
401 which the cells were driven towards this pattern, in the Lagrangian frame of reference of the cells,  
402 is  $D_t\theta = -\frac{\lambda\gamma r_0^2}{4qr^2} \sin(2\theta)$ . We tested this relationship in the simulation data by comparing the  
403 instantaneous angular velocity  $D_t\theta$  and  $\frac{1}{r^2} \sin(2\theta)$  (Fig. 3d). Note that we nondimensionalized the  
404  $x$ -axis by the final colony radius 25  $\mu\text{m}$ . We varied the radius of the growth void  $r_0$  and repeated  
405 the same procedure and for each simulation run, we plotted the slope of the line of best fit versus  
406  $r_0^2$  (Fig. 3d inset).

407

#### 408 Data and materials availability

409 Matlab codes for single-cell segmentation are available online at Github:  
410 [https://github.com/Haoran-Lu/Segmentation\\_3D-processing/releases/tag/v1.0](https://github.com/Haoran-Lu/Segmentation_3D-processing/releases/tag/v1.0). Other data are  
411 available upon request.

412

#### 413 **References**

- 414 1. Lecuit, T. & Le Goff, L. Orchestrating size and shape during morphogenesis. *Nature* **450**,  
415 189–192 (2007).
- 416 2. Irvine, K. D. & Shraiman, B. I. Mechanical control of growth: ideas, facts and challenges.  
417 *Development* **144**, 4238–4248 (2017).
- 418 3. Hong, L. *et al.* Heterogeneity and robustness in plant morphogenesis: from cells to organs.  
419 *Annu. Rev. Plant Biol.* **69**, 469–495 (2018).

- 420 4. Flemming, H.-C. & Wingender, J. The biofilm matrix. *Nat. Rev. Microbiol.* **8**, 623–633  
421 (2010).
- 422 5. Dragoš, A. & Kovács, Á. T. The peculiar functions of the bacterial extracellular matrix.  
423 *Trends Microbiol.* **25**, 257–266 (2017).
- 424 6. Hall-Stoodley, L., Costerton, J. W. & Stoodley, P. Bacterial biofilms: from the natural  
425 environment to infectious diseases. *Nat. Rev. Microbiol.* **2**, 95–108 (2004).
- 426 7. Ghannoum, M., Parsek, M., Whiteley, M. & Mukherjee, P. *Microbial Biofilms*. (ASM Press,  
427 2015).
- 428 8. Wuertz, S., Bishop, P. & Wilderer, P. *Biofilms in wastewater treatment: an interdisciplinary  
429 approach*. (IWA Publishing, 2003).
- 430 9. Franks, A. E., Malvankar, N. & Nevin, K. P. Bacterial biofilms: the powerhouse of a  
431 microbial fuel cell. *Biofuels* **1**, 589–604 (2010).
- 432 10. Asally, M. *et al.* Localized cell death focuses mechanical forces during 3D patterning in a  
433 biofilm. *Proc. Natl. Acad. Sci. USA* **109**, 18891–18896 (2012).
- 434 11. Trejo, M. *et al.* Elasticity and wrinkled morphology of *Bacillus subtilis* pellicles. *Proc. Natl.*  
435 *Acad. Sci. USA* **110**, 2011–2016 (2013).
- 436 12. Yan, J. *et al.* Mechanical instability and interfacial energy drive biofilm morphogenesis.  
437 *eLife* **8**, e43920 (2019).
- 438 13. Drescher, K. *et al.* Architectural transitions in *Vibrio cholerae* biofilms at single-cell  
439 resolution. *Proc. Natl. Acad. Sci. USA* **113**, E2066–2072 (2016).
- 440 14. Yan, J., Sharo, A. G., Stone, H. A., Wingreen, N. S. & Bassler, B. L. *Vibrio cholerae* biofilm  
441 growth program and architecture revealed by single-cell live imaging. *Proc. Natl. Acad. Sci.*  
442 *USA* **113**, E5337–E5343 (2016).

- 443 15. Hartmann, R. *et al.* Emergence of three-dimensional order and structure in growing biofilms.  
444 *Nat. Phys.* **15**, 251–256 (2019).
- 445 16. Qin, B. *et al.* Cell position fates and collective fountain flow in bacterial biofilms revealed by  
446 light-sheet microscopy. *Science* **369**, 71–77 (2020).
- 447 17. Doostmohammadi, A., Thampi, S. P. & Yeomans, J. M. Defect-mediated morphologies in  
448 growing cell colonies. *Phys. Rev. Lett.* **117**, 048102 (2016).
- 449 18. You, Z., Pearce, D. J. G., Sengupta, A. & Giomi, L. Geometry and mechanics of  
450 microdomains in growing bacterial colonies. *Phys. Rev. X* **8**, 031065 (2018).
- 451 19. Dell’Arciprete, D. *et al.* A growing bacterial colony in two dimensions as an active nematic.  
452 *Nat. Commun.* **9**, 4190 (2018).
- 453 20. Vernita, D. G., Megan, D.-F., Kristin, K. & Christopher, A. R. Biofilms and mechanics: a  
454 review of experimental techniques and findings. *J. Phys. D* **50**, 223002 (2017).
- 455 21. Marchetti, M. C. *et al.* Hydrodynamics of soft active matter. *Rev. Mod. Phys.* **85**, 1143–1189  
456 (2013).
- 457 22. Liu, S., Shankar, S., Marchetti, M. C. & Wu, Y. Viscoelastic control of spatiotemporal order  
458 in bacterial active matter. *Nature* **590**, 80–84 (2021).
- 459 23. He, B., Doubrovinski, K., Polyakov, O. & Wieschaus, E. Apical constriction drives tissue-  
460 scale hydrodynamic flow to mediate cell elongation. *Nature* **508**, 392–396 (2014).
- 461 24. Keller, P. J., Schmidt, A. D., Wittbrodt, J. & Stelzer, E. H. K. Reconstruction of zebrafish  
462 early embryonic development by scanned light sheet microscopy. *Science* **322**, 1065 (2008).
- 463 25. Petkova, M. D., Tkačik, G., Bialek, W., Wieschaus, E. F. & Gregor, T. Optimal decoding of  
464 cellular identities in a genetic network. *Cell* **176**, 844–855.e15 (2019).

- 465 26. Beyhan, S. & Yildiz, F. H. Smooth to rugose phase variation in *Vibrio cholerae* can be  
466 mediated by a single nucleotide change that targets c-di-GMP signalling pathway. *Mol.*  
467 *Microbiol.* **63**, 995–1007 (2007).
- 468 27. Andrienko, D. Introduction to liquid crystals. *J. Mol. Liq.* **267**, 520–541 (2018).
- 469 28. Fei, C. *et al.* Nonuniform growth and surface friction determine bacterial biofilm  
470 morphology on soft substrates. *Proc. Natl. Acad. Sci. USA* **117**, 7622–7632 (2020).
- 471 29. Fong, J. C. N. & Yildiz, F. H. The *rbmBCDEF* gene cluster modulates development of  
472 rugose colony morphology and biofilm formation in *Vibrio cholerae*. *J. Bacteriol.* **189**,  
473 2319–2330 (2007).
- 474 30. Absalon, C., Van Dellen, K. & Watnick, P. I. A communal bacterial adhesin anchors biofilm  
475 and bystander cells to surfaces. *PLoS Pathog.* **7**, e1002210 (2011).
- 476 31. Berk, V. *et al.* Molecular architecture and assembly principles of *Vibrio cholerae* biofilms.  
477 *Science* **337**, 236–239 (2012).
- 478 32. Fong, J. C. N., Syed, K. A., Klose, K. E. & Yildiz, F. H. Role of *Vibrio* polysaccharide (*vps*)  
479 genes in VPS production, biofilm formation and *Vibrio cholerae* pathogenesis. *Microbiology*  
480 **156**, 2757–2769 (2010).
- 481 33. Beroz, F. *et al.* Verticalization of bacterial biofilms. *Nat. Phys.* **14**, 954–960 (2018).
- 482 34. Başaran, M., Yaman, Y. I., Yuce, T. C., Vetter, R. & Kocabas, A. Large-scale orientational  
483 order in bacterial colonies during inward growth. Preprint at <https://arxiv.org/abs/2008.05545>  
484 (2021).
- 485 35. Leslie, F. M. Some constitutive equations for liquid crystals. *Arch. Rational Mech. Anal.* **28**,  
486 265–283 (1968).

- 487 36. Grant, M. A. A., Waclaw, B., Allen, R. J. & Cicuta, P. The role of mechanical forces in the  
488 planar-to-bulk transition in growing *Escherichia coli* microcolonies. *J. R. Soc. Interface* **11**,  
489 20140400 (2014).
- 490 37. You, Z., Pearce, D. J. G., Sengupta, A. & Giomi, L. Mono- to multilayer transition in  
491 growing bacterial colonies. *Phys. Rev. Lett.* **123**, 178001 (2019).
- 492 38. Duvernoy, M.-C. *et al.* Asymmetric adhesion of rod-shaped bacteria controls microcolony  
493 morphogenesis. *Nat. Commun.* **9**, 1120 (2018).
- 494 39. Marchetti, M. C. *et al.* Hydrodynamics of soft active matter. *Rev. Mod. Phys.* **85**, 1143–1189  
495 (2013).
- 496 40. Doostmohammadi, A., Ignés-Mullol, J., Yeomans, J. M. & Sagués, F. Active nematics. *Nat.*  
497 *Commun.* **9**, 3246 (2018).
- 498 41. Beris, Antony. N. & Edwards, B. J. *Thermodynamics of flowing systems: with internal*  
499 *microstructure*. (Oxford University Press, 1994).
- 500 42. Volfson, D., Cookson, S., Hasty, J. & Tsimring, L. S. Biomechanical ordering of dense cell  
501 populations. *Proc. Natl. Acad. Sci. USA* **105**, 15346–15351 (2008).
- 502 43. You, Z., Pearce, D. J. G. & Giomi, L. Confinement-induced self-organization in growing  
503 bacterial colonies. *Sci. Adv.* **7**, eabc8685 (2021).
- 504 44. Thompson, D. W. *On Growth and Form*. (Cambridge University Press, 1992).
- 505 45. Copenhagen, K., Alert, R., Wingreen, N. S. & Shaevitz, J. W. Topological defects promote  
506 layer formation in *Myxococcus xanthus* colonies. *Nat. Phys.* **17**, 211–215 (2021).
- 507 46. Saw, T. B. *et al.* Topological defects in epithelia govern cell death and extrusion. *Nature*  
508 **544**, 212–216 (2017).
- 509 47. Jin, X. & Riedel-Kruse, I. H. Biofilm Lithography enables high-resolution cell patterning via  
510 optogenetic adhesin expression. *Proc. Natl. Acad. Sci. USA* **115**, 3698–3703 (2018).

- 511 48. Parry, B. R. *et al.* The bacterial cytoplasm has glass-like properties and is fluidized by  
512 metabolic activity. *Cell* **156**, 183–194 (2014).
- 513 49. Skorupski, K. & Taylor, R. K. Positive selection vectors for allelic exchange. *Gene* **169**, 47–  
514 52 (1996).
- 515 50. Dalia, A. B., McDonough, E. & Camilli, A. Multiplex genome editing by natural  
516 transformation. *Proc. Natl. Acad. Sci. USA* **111**, 8937 (2014).
- 517 51. Crocker, J. C. & Grier, D. G. Methods of digital video microscopy for colloidal studies. *J.*  
518 *Colloid Interface Sci.* **179**, 298–310 (1996).
- 519 52. Wang, Y. *et al.* Antimicrobial blue light inactivation of pathogenic microbes: State of the art.  
520 *Drug Resist. Updat.* **33–35**, 1–22 (2017).
- 521 53. Ghosh, P., Mondal, J., Ben-Jacob, E. & Levine, H. Mechanically-driven phase separation in  
522 a growing bacterial colony. *Proc. Natl. Acad. Sci. USA* **112**, E2166–E2173 (2015).
- 523 54. Lardon, L. A. *et al.* iDynoMiCS: next-generation individual-based modelling of biofilms.  
524 *Environ. Microbiol.* **13**, 2416–2434 (2011).
- 525 55. Willis, J. R. Hertzian contact of anisotropic bodies. *J. Mech. Phys. Solids* **14**, 163–176  
526 (1966).
- 527 56. Chen, X. & Elliott, J. A. On the scaling law of JKR contact model for coarse-grained  
528 cohesive particles. *Chem. Eng. Sci.* **227**, 115906 (2020).
- 529 57. Plimpton, S. Fast parallel algorithms for short-range molecular dynamics. *J. Comput. Phys.*  
530 **117**, 1–19 (1995).

531

532 **Acknowledgments:** We thank Drs. A. Mashruwala and Y. Xu for their help in the initial  
533 experiments. We thank Drs S. Mao, T. Cohen, and J.-S. Tai for helpful discussions and B. Reed  
534 and M. Zhao for help with developing the ABSs.

535

536 **Author contributions:** J.N. and J.Y. designed and performed the experiments. J.N., Q.Z., H.L.,  
537 and J.Y. analyzed data. C.L. and S.Z. developed the agent-based simulations. J.N. developed the  
538 continuum theory. J.N., C.L., S.Z., and J.Y. wrote the paper.

539

540 **Competing interests:** The authors declare that they have no competing interests.

541

542 **Supplementary Materials:** Supplementary information is available for this paper.

543 Correspondence and requests for materials should be addressed to either [jing.yan@yale.edu](mailto:jing.yan@yale.edu) or  
544 [suz10@psu.edu](mailto:suz10@psu.edu)

545



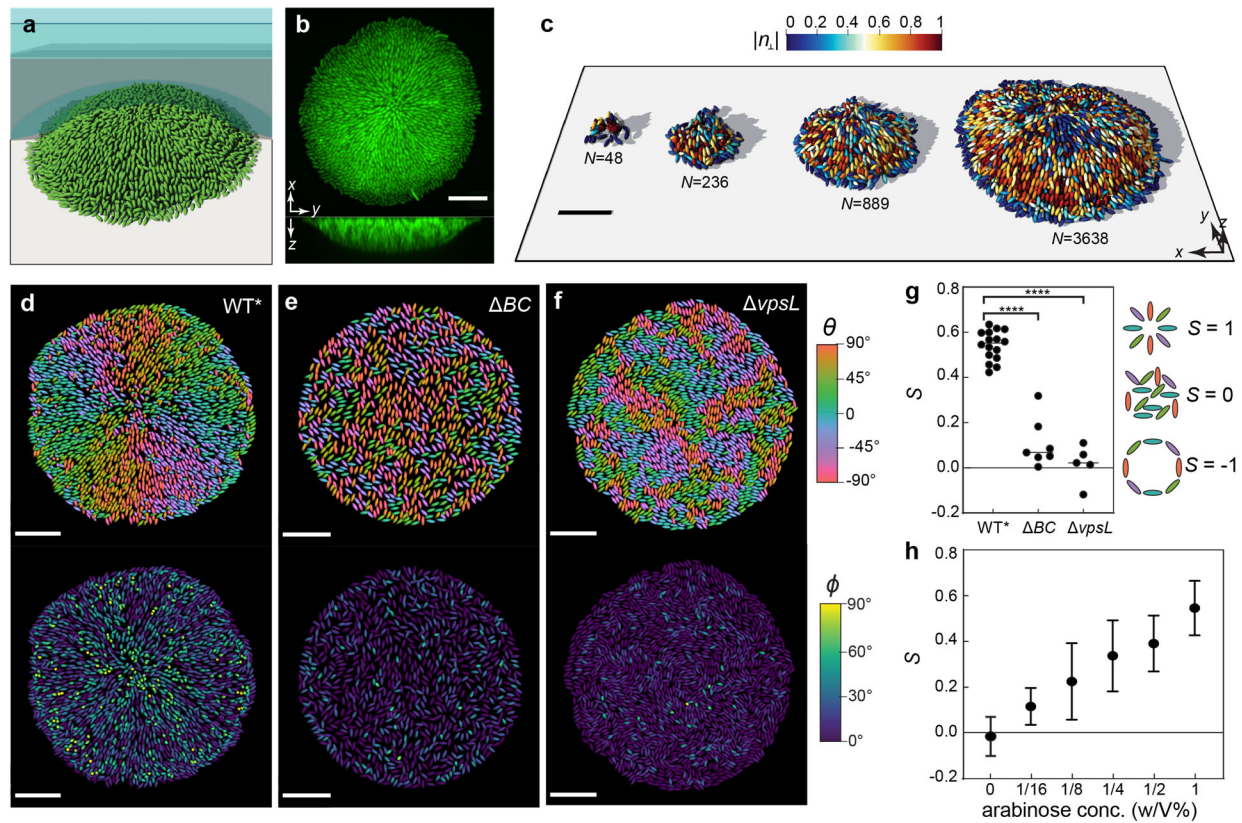

546

547

548

549

550

551

552

553

554

555

556

557

558

**Fig. 1| *V. cholerae* biofilms self-organize into aster patterns.** **a**, Schematic of the experimental setup, where *V. cholerae* biofilms (green) were grown on a glass surface covered by a hydrogel (blue shaded). **b**, Representative cross-sectional views of a WT\* biofilm expressing mNeonGreen. **c**, Single-cell 3D reconstruction of biofilm structures over time with different numbers of cells  $N$ . **d-f**, Cell orientation color-coded according to each cell's angle in the basal plane  $\theta$  (*Top*) or the angle it makes with the substrate  $\phi$  (*Bottom*), in a biofilm that produces both exopolysaccharides and surface adhesion proteins (WT\*; **d**), in a biofilm that only produces exopolysaccharides ( $\Delta ABC$ ; **e**), and in a bacterial colony with neither exopolysaccharides nor surface adhesion ( $\Delta vpsL$ ; **f**). Scale bars, 10  $\mu\text{m}$ . **g**, Radial order parameter  $S$  quantifying the degree to which cells conform to an aster pattern in the three strains. Data was subjected to ANOVA for comparison of means. \*\*\*\*denotes  $P < 0.0001$ . **h**,  $S$  in biofilms in which the expression of *rbmC* is controlled by an arabinose inducible promoter. Error bars correspond to standard deviation.

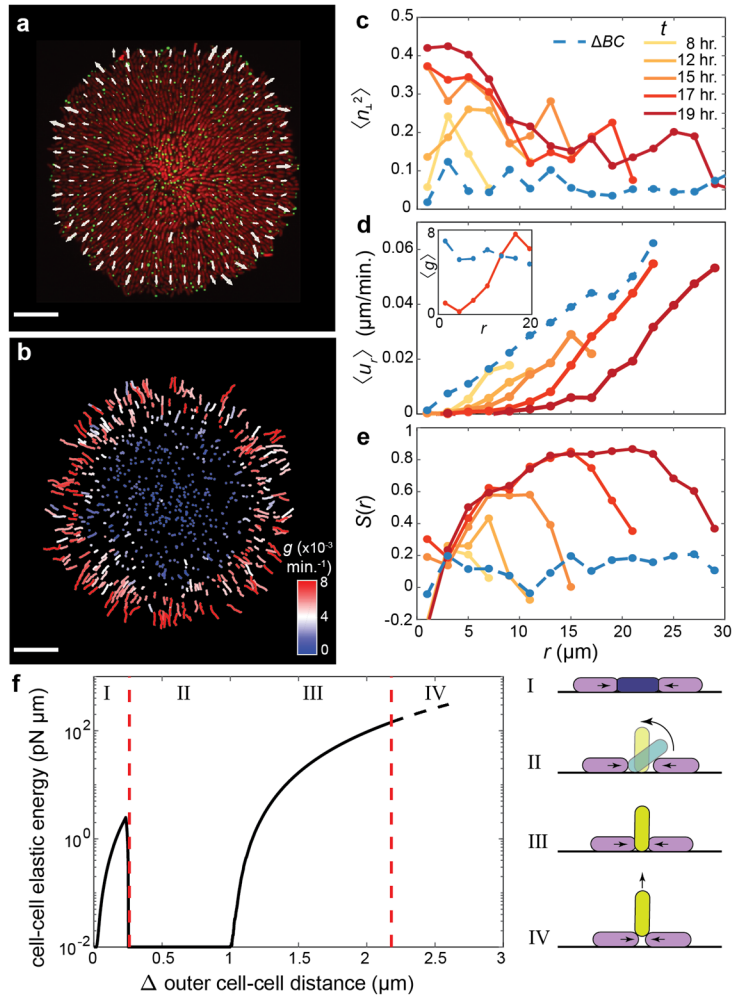

559

560

561

562

563

564

565

566

567

568

**Fig. 2| Growth-induced cellular flow and surface anchoring jointly lead to aster formation in biofilms.** **a**, Raw image of the basal layer of a biofilm consisting of cells constitutively expressing mScarlet-I cytosolically and mNeonGreen-labelled puncta. Overlain is the velocity field measured from puncta trajectories. **b**, Puncta trajectories colored by the apparent in-plane growth rate  $g$ . The apparent in-plane growth rate is calculated as  $g(r) = (\partial_r r u_r)/r$  in a neighborhood around each cell. Scale bars, 10  $\mu\text{m}$ . **c-e**, Azimuthally averaged degree of verticalization  $\langle n_{\perp}^2 \rangle$  (**c**), radial velocity  $\langle u_r \rangle$  (Inset: apparent in-plane growth rate  $\langle g \rangle \times 10^{-3} \text{min}^{-1}$ ) (**d**), and radial order parameter  $S$  (**e**), as a function of distance  $r$  from the center, in the basal layer. The dashed blue lines denote results from the nonadherent mutant. **f**, Results of a

569 reduced problem showing the strain energy due to cell-to-cell contacts in a cell as it is squeezed  
570 by two neighbors (black line). The dashed red lines denote the results from stability analyses  
571 (Supplementary Information Section 3). Upon increasing compression, the central cell evolves  
572 through four phases, which are given schematically.

573

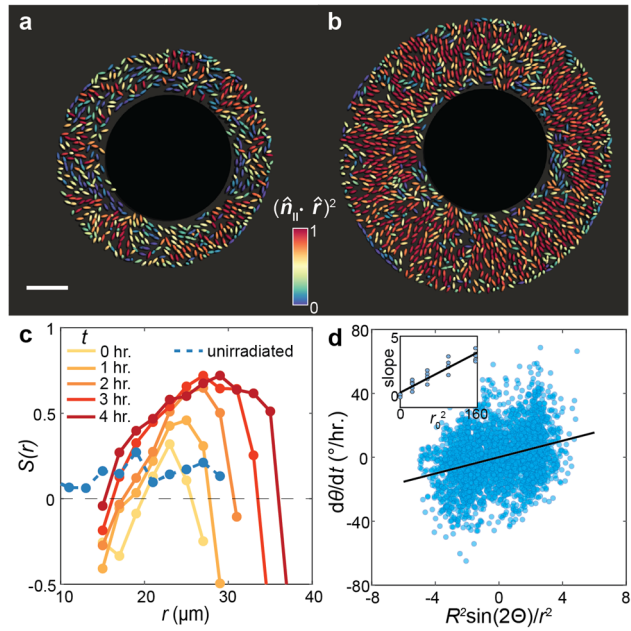

574 **Fig. 3| Cell organization can be manipulated by controlling spatial growth patterns. a, b,** A  
 575 nonadherent biofilm grown for 17 hours was irradiated using 405 nm laser to induce cell death in  
 576 a circle of radius 15  $\mu\text{m}$  at the center. Colors denote the degree of radial alignment of individual  
 577 cells  $(\hat{n}_{\parallel} \cdot \hat{r})^2$ . **c,**  $S(r)$  in the irradiated biofilm (colored according to time) and the unirradiated  
 578 control (blue). **d,** Angular velocity of individual cells from ABSs with a growth void plotted  
 579 against the predicted nondimensionalized driving force. Inset: Fitted slope from **d** for different  
 580 growth void sizes  $r_0$  ( $\mu\text{m}^2$ ).

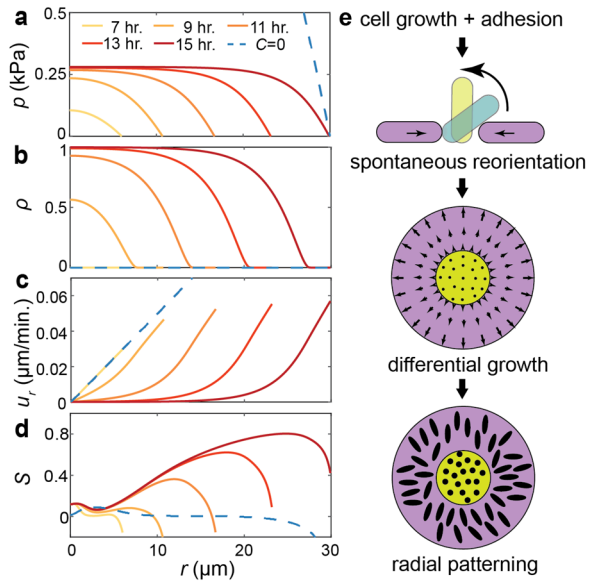

581

582 **Fig. 4| A two-phase active nematic model predicts spontaneous generation of differential**  
583 **proliferation and macroscopic cell organization. a-d**, Numerical solution of the model  
584 consisting of a population of horizontal and vertical cells. The biofilm was initiated with no vertical  
585 cells and random in-plane orientations. Evolution of pressure  $p$  (a), fraction of vertical cells  $\rho$  (b),  
586 in plane radial velocity  $u_r$  (c), and radial order parameter  $S$  (d). Curves are colored according to  
587 time. Results for a biofilm that cannot sustain verticalized cells ( $C = 0$ ) are shown in blue. e,  
588 Schematic representation of the biofilm self-patterning process.
